# Supplementary material for: Fabrication and characterization of KGM-based FMBO-containing aerogels for removal of arsenite in aqueous solution
Source: Royal Society of Chemistry journal article supplement (doi:10.1039/c5ra03757c), 2015-01-01
Supplement: c5ra03757c1.pdf [file c5ra03757c1.pdf]

**Supplementary information:**

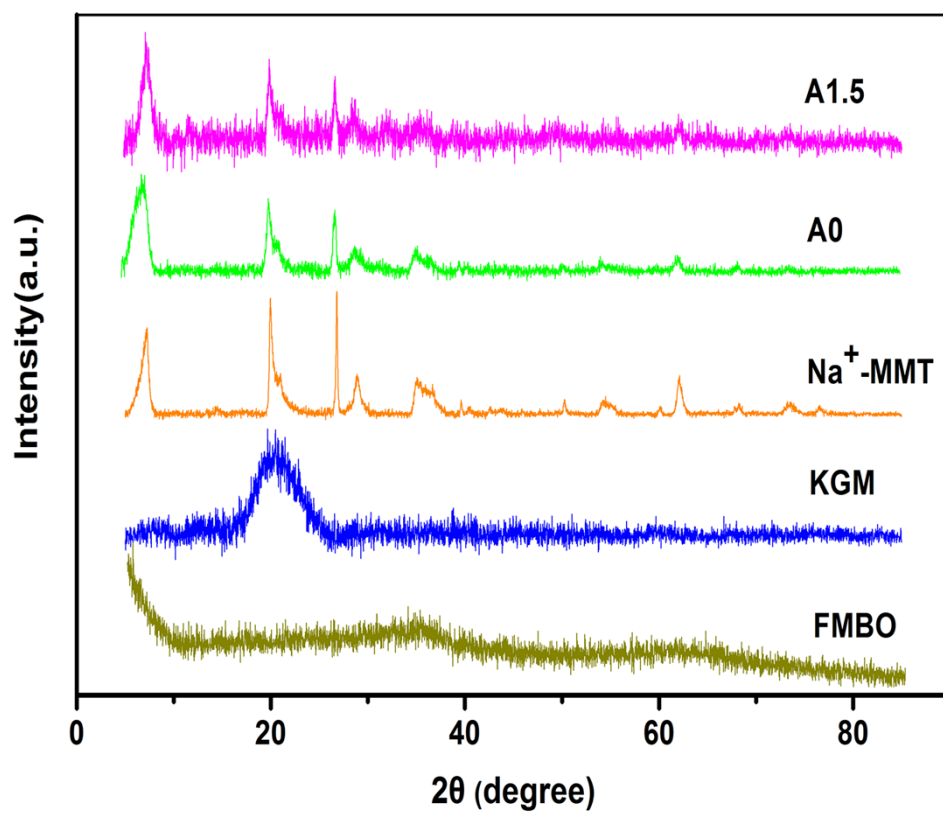

**Fig.S1** X-ray diffraction pattern of FMBO, KGM, Na<sup>+</sup>-MMT, Da-KGM aerogels of A0 and A1.5

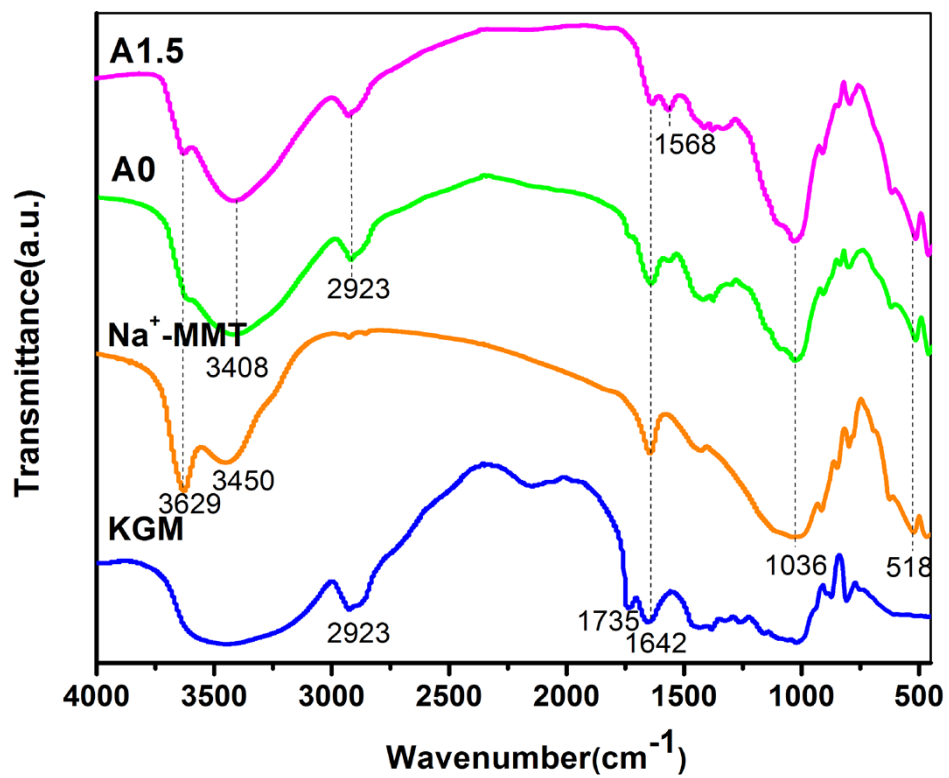

Fig.S2 FTIR spectra of KGM, Na<sup>+</sup>-MMT and Da-KGM aerogels (A0, A1.5).

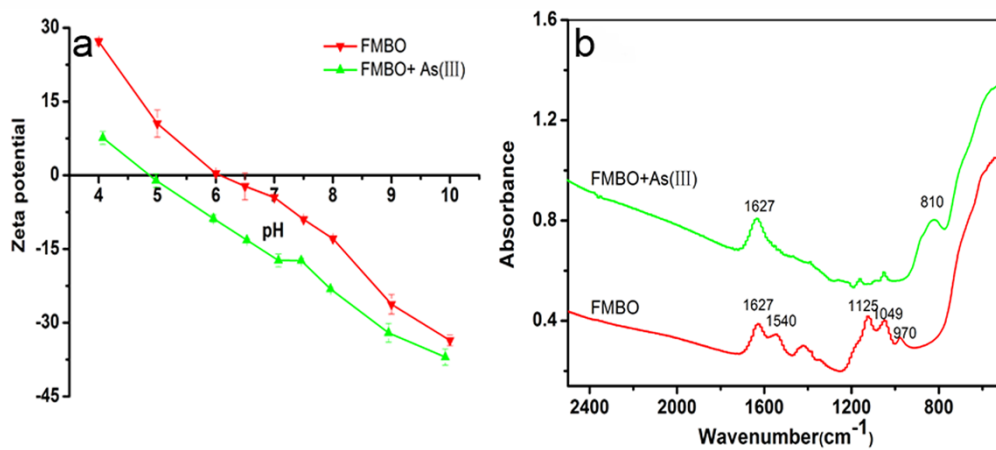

**Fig.S3** (a) Zeta potential and (b) FTIR spectra of FMBO before and after reaction with As(III). (Experimental conditions of FMBO after reaction with As(III): initial As(III) concentration=10 mg L<sup>-1</sup>; FMBO content =0.2 g L<sup>-1</sup>; pH =6.9 ± 0.1)
